# Supplementary material for: MELK Inhibition in Diffuse Intrinsic Pontine Glioma
Source: Oxford University Press journal article supplement (doi:10.1158/1078-0432.ccr-18-0924), 2018-07-30
Supplement: 10780432ccr180924-sup-199015_3_supp_4888921_pbr46g.xlsx [file 10780432ccr180924-sup-199015_3_supp_4888921_pbr46g.xlsx]

## Sheet: Blad1
Source	Proteomicsdb.org
Inhibitor	OTSSP167
Selection criterium	EC50 <50nM
Protein ID	Gene Name	EC50 (nM)
47802	BMPR1B	3
48350	GAK	9
53686	CSNK2A2	10
57524	CSNK2B	11
57536	CSNK2A1	11
50215	EIF3J	14
50444	STK10	15
48908	RIPK2	19
68829	TAOK1	26
80560	TAOK3	28
52729	BCR	28
86578	IRAK3	29
60115	MELK	33
83953	NLK	36
57854	CDK16	36
